# Supplementary material
Source: PubMed Central journal article supplement (PMC4232503)
Supplement: supp_217.14.2440_JEB102855.pdf [file supp_217.14.2440_JEB102855.pdf]

## Supplementary Figure 1

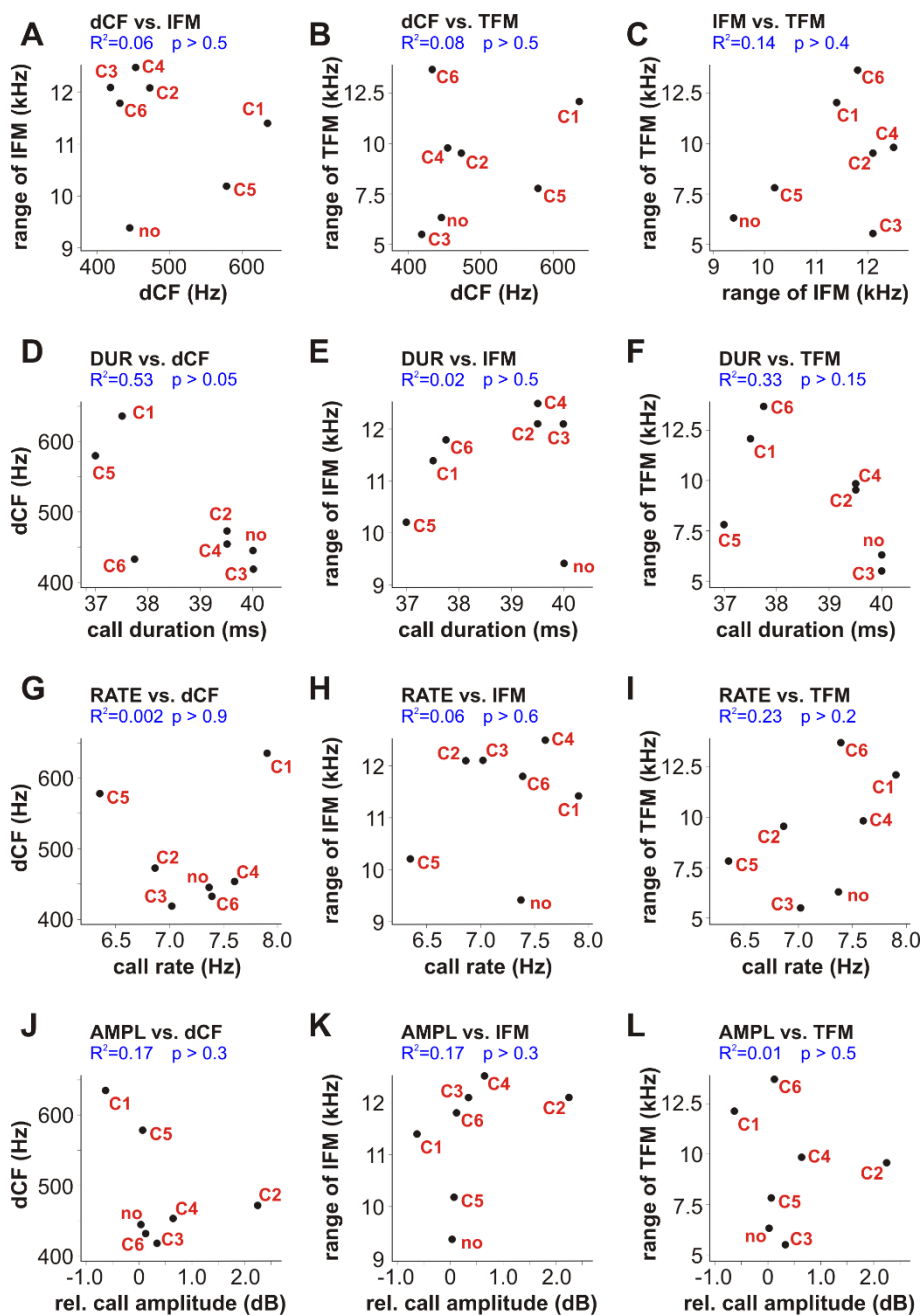

Distribution of medians of dCF bandwidth, range of FM components, call duration, rate and relative call amplitude during the different BFN conditions and the control (no BFN; “no”). Distribution of medians of (A) dCF and IFM, (B) dCF and TFM, (C) IFM and TFM, (D) call duration (DUR) and dCF, (E) DUR and IFM, (F) DUR and TFM, (G) call rate (RATE) and dCF, (H) RATE and IFM, (I) RATE and TFM, (J) relative call amplitude (AMPL) and dCF, (K) AMPL and IFM and (L) AMPL and TFM. There are no significant correlations between any call components in response to BFN (Pearson's correlation).

## Supplementary Figure 2

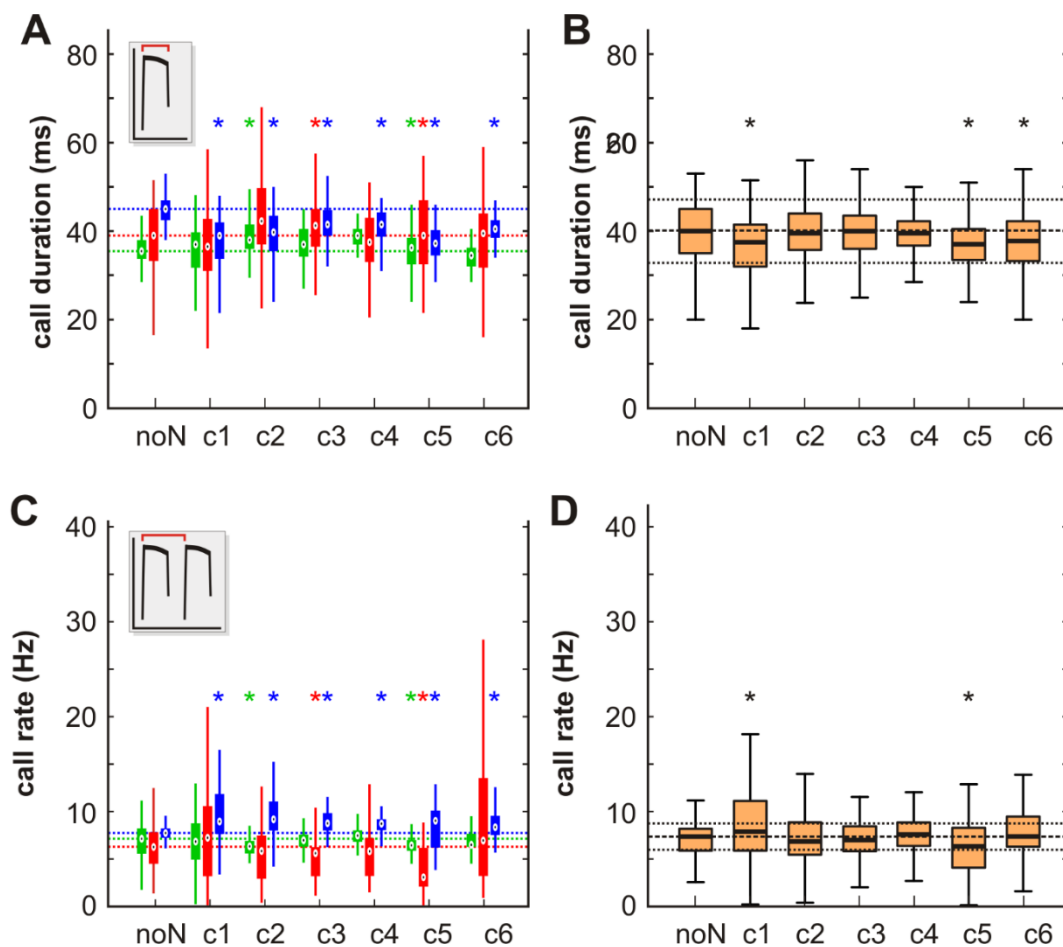

**Distribution of call duration and rate in response to different BFN conditions and the control (noN).** **A** Distribution of call duration for all 3 bats (green: bat#1, red: bat#2, blue: bat#3) and **B** averaged for all three bats. **C** Distribution of call rate for all 3 bats (green: bat#1, red: bat#2, blue: bat#3) and **D** averaged for all three bats. Medians: white dots (A and C) and horizontal bars (B and D) inside boxes; 1<sup>st</sup> and 3<sup>rd</sup> quartile: upper and lower margins of boxes, respectively; 5 % and 95 %: end of vertical bar (A and C) and small vertical bars (B and D) above and below boxes, respectively.

Table S1. Kruskal-Wallis-test results across all BFN conditions for the medians of dCF, IFM, TFM, duration (DUR) and rate (RATE). Results are given for every single bat and pooled for all three bats (df = 6 and  $p < 0.001$  for all performed tests).

| <b>data set</b>    | <b><math>\chi^2</math></b> | <b>sample size</b> |
|--------------------|----------------------------|--------------------|
| dCF – bat #1       | 51.7                       | 137                |
| dCF – bat #2       | 57.4                       | 140                |
| dCF – bat #3       | 40.3                       | 146                |
| dCF – pooled data  | 85.1                       | 423                |
| IFM – bat #1       | 50.0                       | 854                |
| IFM – bat #2       | 411.1                      | 813                |
| IFM – bat #3       | 58.1                       | 767                |
| IFM – pooled data  | 134.5                      | 2434               |
| TFM – bat #1       | 168.0                      | 854                |
| TFM – bat #2       | 434.4                      | 813                |
| TFM – bat #3       | 241.3                      | 767                |
| TFM – pooled data  | 601.3                      | 2434               |
| DUR – bat #1       | 94.8                       | 700                |
| DUR – bat #2       | 27.4                       | 700                |
| DUR – bat #3       | 132.7                      | 700                |
| DUR – pooled data  | 74.6                       | 2100               |
| RATE – bat #1      | 57.9                       | 700                |
| RATE – bat #2      | 61.0                       | 700                |
| RATE – bat #3      | 58.0                       | 700                |
| RATE – pooled data | 62.2                       | 2100               |
